# Supplementary material for: In Search of Authenticity Biomarkers in Food Supplements Containing Sea Buckthorn: A Metabolomics Approach
Source: MDPI journal article supplement (doi:10.3390/foods12244493), 2023-12-15
Supplement: s1 [file s1]

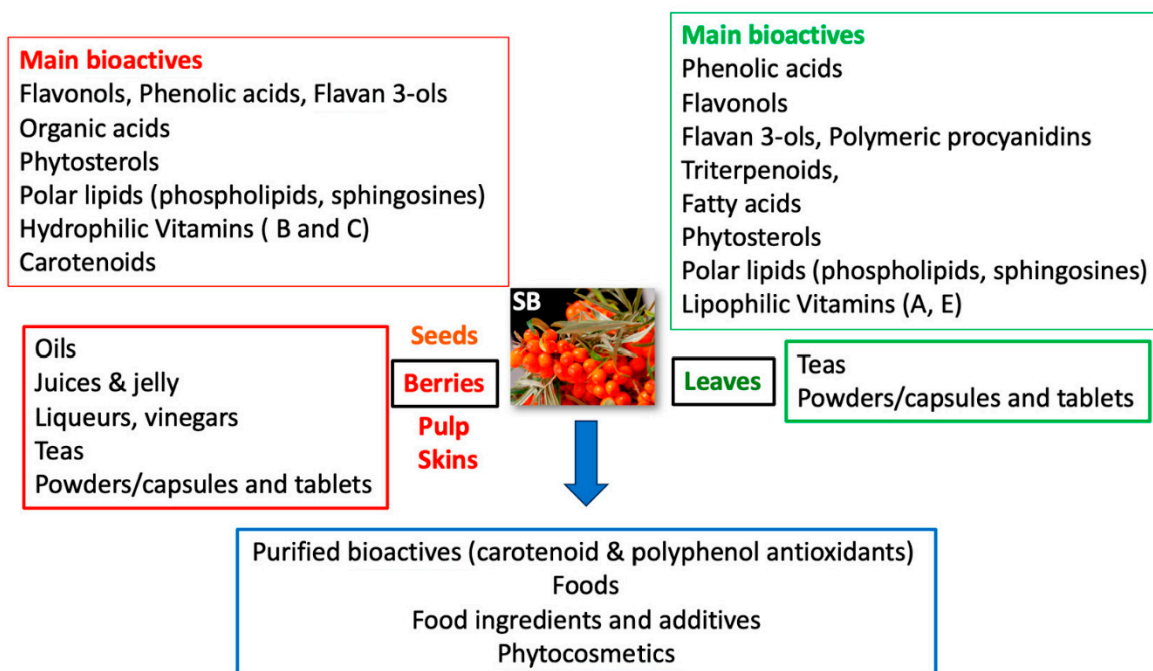

**Supplementary Figure S1.** The main chemical constituents and applications of sea buckthorn (*Hippophae rhamnoides* L. or *Elaeagnus rhamnoides* (L.) A. Nelson).
