# Supplementary material for: In Search of Authenticity Biomarkers in Food Supplements Containing Sea Buckthorn: A Metabolomics Approach
Source: MDPI journal article supplement (doi:10.3390/foods12244493), 2023-12-15
Supplement: s1 [file s1]

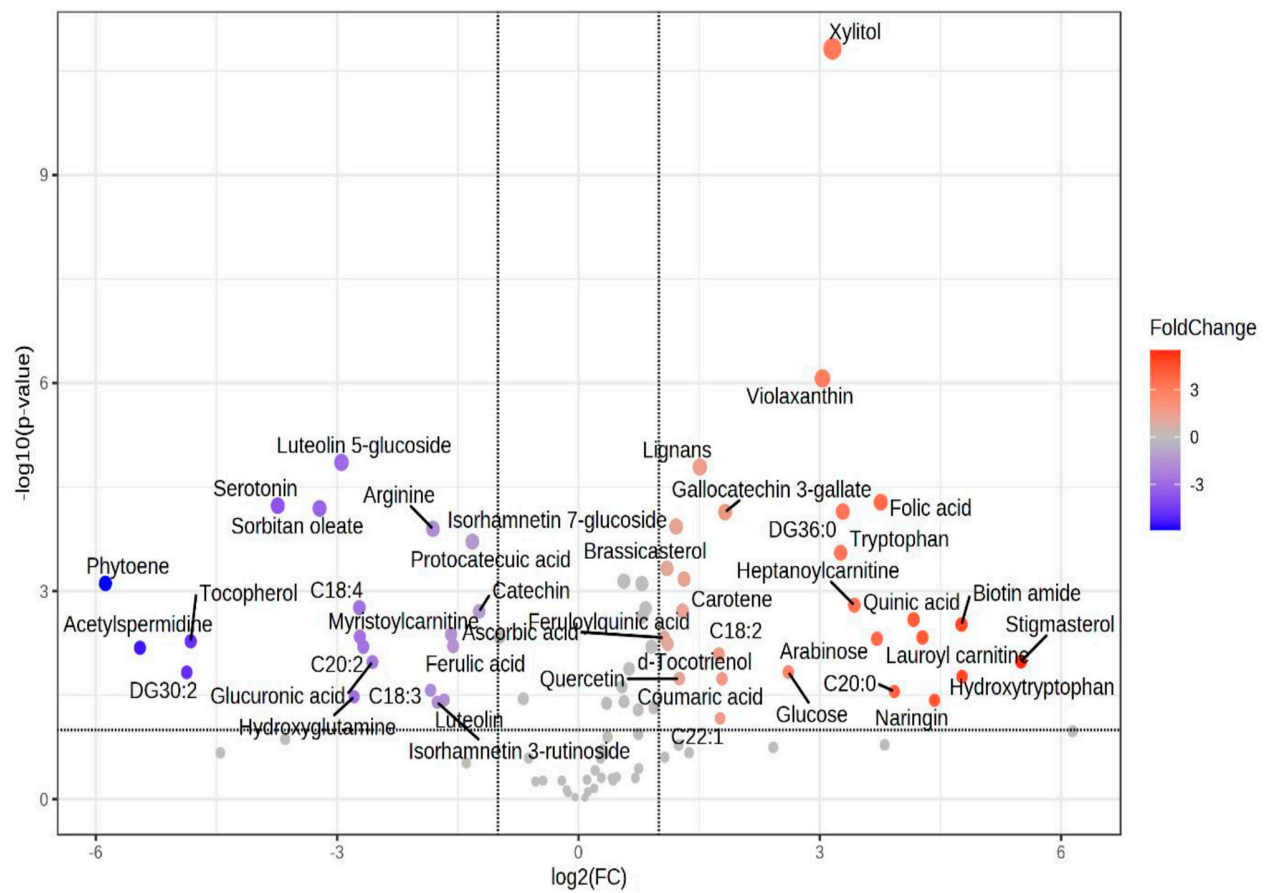

**Supplementary Figure S3.** Volcano plot algorithm used to determine  $\log_{10}(\text{p-value})$  *versus*  $\log_2(\text{FC})$  values and the dynamics (increase or decrease) of molecules' levels between SB leaves and berries.
