# Supplementary material for: In Search of Authenticity Biomarkers in Food Supplements Containing Sea Buckthorn: A Metabolomics Approach
Source: MDPI journal article supplement (doi:10.3390/foods12244493), 2023-12-15
Supplement: s1 [file s1]

**Supplementary Table S1.** Identification of 98 molecules found in sea buckthorn leaves or berries, based on the MS data  $[M+H]^+$  ( $m/z$  values). The experimental  $m/z$  values were compared with the average  $m/z$  values from the International database FooDB (<https://foodb.ca/>). The FooDB codes were mentioned, considering the accuracy of (theoretical – experimental)  $m/z$  values below 20 ppm.

| $[M+H]^+$ ( $m/z$ ) | Identification of putative biomarkers          | FooDB code |
|---------------------|------------------------------------------------|------------|
| 151.0389            | Arabinose                                      | FDB001218  |
| 153.1304            | Xylitol                                        | FDB001134  |
| 155.0092            | 2,3-Dihydroxybenzoic (protocatechuic acid)acid | FDB012200  |
| 163.0778            | L-4-Hydroxyglutamine                           | FDB000524  |
| 165.0587            | p-Coumaric acid                                | FDB002593  |
| 169.0250            | Vanillic acid                                  | FDB000846  |
| 171.0317            | Gallic acid                                    | FDB000662  |
| 175.1362            | Arginine                                       | FDB002257  |
| 177.0098            | Ascorbic acid                                  | FDB001223  |
| 177.0581            | Allantoic acid                                 | FDB012646  |
| 177.1153            | Serotonin                                      | FDB012158  |
| 181.0491            | Caffeic acid                                   | FDB002558  |
| 181.1254            | Glucose                                        | FDB093715  |
| 183.1054            | D-Glucitol                                     | FDB011676  |
| 188.1777            | N1-Acetylspermidine                            | FDB022530  |
| 193.0475            | (-)-Quinic acid                                | FDB001170  |
| 195.0928            | Ferulic acid                                   | FDB012801  |
| 195.0775            | D-Glucuronic acid                              | FDB006716  |
| 201.1098            | Dodecanoic acid (lauric) C12:0                 | FDB003010  |
| 205.0913            | L-Tryptophan                                   | FDB002250  |
| 205.1836            | Cubenene                                       | FDB097255  |
| 216.1363            | Propenoylcarnitine                             | FDB029297  |
| 221.0816            | 5-Hydroxy-L-tryptophan                         | FDB006231  |
| 229.1470            | Myristic acid (C14:0)                          | FDB031009  |
| 244.1698            | Biotin amide                                   | FDB022636  |
| 255.2377            | Palmitoleic acid (C16:1)                       | FDB004036  |
| 257.2542            | Palmitic acid (C16:0)                          | FDB031084  |
| 266.1391            | Thiamine                                       | FDB008424  |
| 271.0951            | Apigenin                                       | FDB002798  |
| 273.0919            | Naringenin                                     | FDB000678  |
| 274.1814            | Heptanoylcarnitine                             | FDB029350  |
| 275.1684            | Glutaminyglutamine                             | FDB111844  |
| 275.2653            | Digeranyl                                      | FDB013789  |
| 277.2236            | Coniferonic acid (C18:4)                       | FDB004289  |
| 279.2395            | Linolenic acid (C18:3)                         | FDB012462  |
| 281.2551            | Linoleic acid (C18:2)                          | FDB023610  |
| 283.231             | Oleic acid (C18:1)                             | FDB031070  |
| 285.1744            | Cis-Retinal                                    | FDB023842  |

|          |                                     |           |
|----------|-------------------------------------|-----------|
| 285.2967 | Stearic acid (C18:0)                | FDB031183 |
| 286.2192 | Myristoylglycine                    | FDB029359 |
| 287.0621 | Luteolin                            | FDB013255 |
| 287.0697 | Kaempferol                          | FDB000633 |
| 291.0850 | Catechin                            | FDB002571 |
| 300.2927 | C18:1 Sphingosine                   | FDB021919 |
| 303.0011 | Ellagic acid                        | FDB012575 |
| 303.0567 | Quercetin                           | FDB011904 |
| 305.1810 | Arachidonic acid (C20:4)            | FDB011872 |
| 307.1251 | Epigallocatechin                    | FDB017700 |
| 307.2564 | Eicosatrienoic acid (C20:3)         | FDB023082 |
| 309.2158 | Eicosadienoic acid (C20:2)          | FDB005834 |
| 311.2295 | Gondoic (Eicosenoic) acid (C20:1)   | FDB012639 |
| 313.2464 | Arachidic acid (C20:0)              | FDB004028 |
| 317.0697 | Isorhamnetin                        | FDB000604 |
| 319.0358 | Myricetin                           | FDB012724 |
| 333.1741 | Carnosic acid                       | FDB014905 |
| 339.3240 | Erucic acid C22:1                   | FDB004287 |
| 344.2458 | Lauroyl carnitine                   | FDB022928 |
| 354.0253 | Naringenin 5-sulfate                | FDB093741 |
| 355.1131 | kaempferol 3-rhamnoside-7-glucoside | FDB093501 |
| 357.1743 | Ferulic acid 4-glucoside            | FDB000256 |
| 369.1539 | 5-Feruloylquinic acid               | FDB000247 |
| 372.3611 | Myristoylcarnitine                  | FDB023615 |
| 377.1781 | Riboflavin                          | FDB012160 |
| 397.3078 | d-Tocotrienol                       | FDB001299 |
| 399.3222 | Brassicasterol                      | FDB012496 |
| 400.3939 | Palmitoyl carnitine                 | FDB021910 |
| 401.3795 | Campesterol                         | FDB012521 |
| 413.3537 | Stigmasterol                        | FDB001936 |
| 415.1521 | Lignans                             | FDB005955 |
| 415.4086 | Sitosterol                          | FDB007299 |
| 417.3843 | Tocopherol                          | FDB002431 |
| 424.3788 | Linoleyl carnitine                  | FDB023928 |
| 427.3821 | alpha1-Sitosterol                   | FDB001304 |
| 428.3168 | Stearoyl carnitine                  | FDB022278 |
| 429.2931 | Sorbitan oleate                     | FDB001121 |
| 433.1588 | Kaempferol 7-rhamnoside             | FDB016474 |
| 435.1218 | Naringenin 5-glucoside              | FDB011867 |
| 442.1545 | Folic acid                          | FDB014504 |
| 449.1252 | Luteolin 5-glucoside                | FDB006319 |
| 449.1281 | Kaempferol 7-glucoside              | FDB016495 |
| 459.0713 | Gallocatechin 3-gallate             | FDB021740 |
| 465.0979 | Quercetin 7-glucoside               | FDB002523 |
| 479.0677 | Neoglucobrassicin                   | FDB017734 |

|          |                            |           |
|----------|----------------------------|-----------|
| 479.1042 | Isorhamnetin 7-glucoside   | FDB000606 |
| 537.4106 | Carotene                   | FDB003842 |
| 537.4221 | DG(30:2)                   | FDB024235 |
| 541.4506 | DG(30:0)                   | FDB024289 |
| 545.5254 | Phytoene                   | FDB015831 |
| 549.0808 | NI                         |           |
| 569.4237 | Zeaxanthin                 | FDB014726 |
| 581.1420 | Naringin                   | FDB011866 |
| 597.1189 | Quercetin 3-gluco-xyloside | FDB006895 |
| 601.4238 | cis-Violaxanthin           | FDB007098 |
| 611.1939 | Quercetin 3-rutinoside     | FDB002536 |
| 614.516  | NI                         |           |
| 625.1908 | Isorhamnetin 3-rutinoside  | FDB000609 |
| 625.5710 | DG(36:0)                   | FDB098471 |
| 627.1666 | Quercetin 3,7-diglucoside  | FDB016393 |
